# Supplementary material for: An electrodeposited superaerophobic nickel catalyst on pencil-drawn paper: a novel approach for highly efficient and stable hydrogen evolution
Source: Royal Society of Chemistry journal article supplement (doi:10.1039/d4qi00101j), 2024-01-01
Supplement: d4qi00101j1.pdf [file d4qi00101j1.pdf]

## Supporting information

### **Electrodeposited Superaerophobic Nickel Catalyst on Pencil-Drawn Paper: A Novel Approach for Highly Efficient and Stable Hydrogen Evolution**

*Qian Sun<sup>1</sup>, Xiaoyu Hao<sup>1</sup>, Tianyi Zhang<sup>1</sup>, Zelin Ma<sup>1</sup>, Kui Hu<sup>6</sup>, Ming Yang<sup>4,5\*</sup>, Xiaolei Huang<sup>3\*</sup>, Xuqin Liu<sup>1,2\*</sup>*

<sup>1</sup> State Key Laboratory of Solidification Processing, Center of Advanced Lubrication and Seal Materials, Northwestern Polytechnical University, Xi'an, Shaanxi 710072, P. R. China.

<sup>2</sup> Shandong Laboratory of Yantai Advanced Materials and Green Manufacture, Yantai, 264006, China

<sup>3</sup> Institute of Material and Chemistry, Ganjiang Innovation Academy, Chinese Academy of Sciences, Ganzhou, 341000, China.

<sup>4</sup> Department of Applied Physics, The Hong Kong Polytechnic University, Hung Hom, Kowloon, Hong Kong SAR, China.

<sup>5</sup> Research Centre on Data Sciences & Artificial Intelligence, The Hong Kong Polytechnic University, Hung Hom, Kowloon, Hong Kong SAR, China.

<sup>6</sup> Department of Chemistry, University of Manchester, Manchester, M13 9PL, UK.

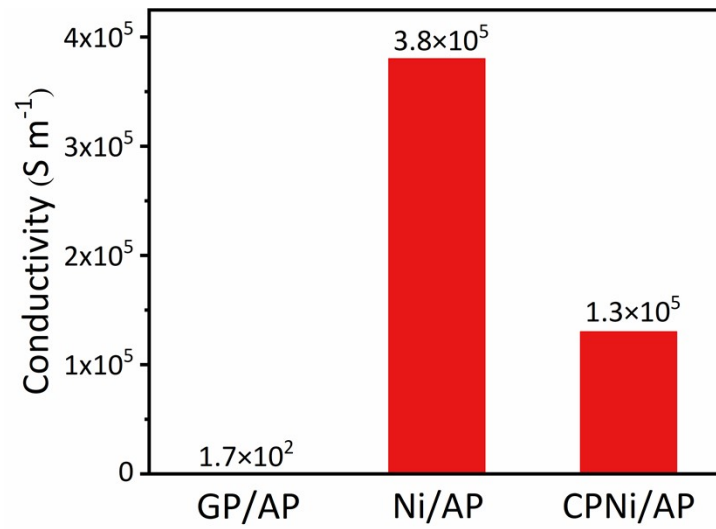

Figure S1. GP/AP, Ni/AP and CPNi/AP's conductivity chart.

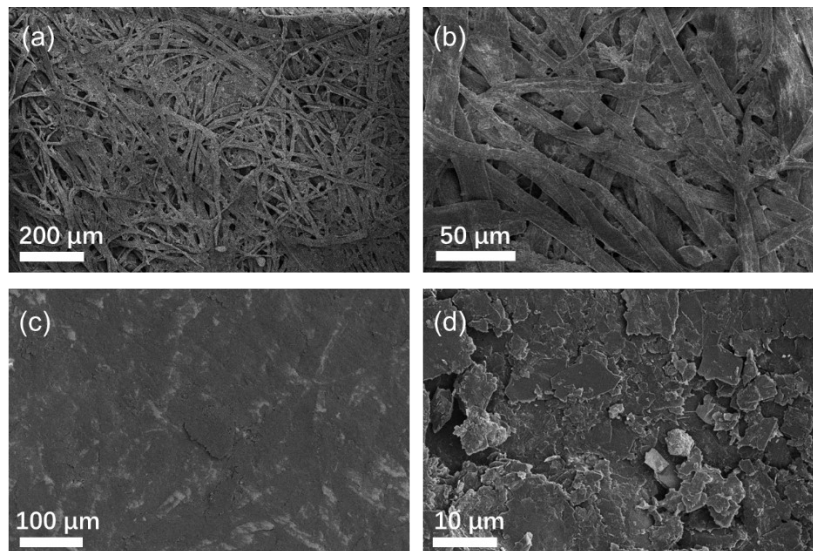

Figure S2. (a)-(b) SEM images of A4 paper and (c)-(d) GC/AP at different magnifications.

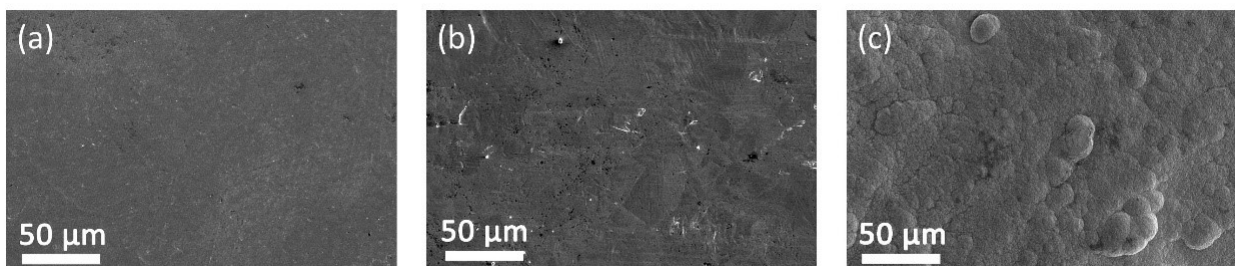

Figure S3. SEM images of (a) Pt Plate, (b) Ni Plate, and (c) Ni/AP.

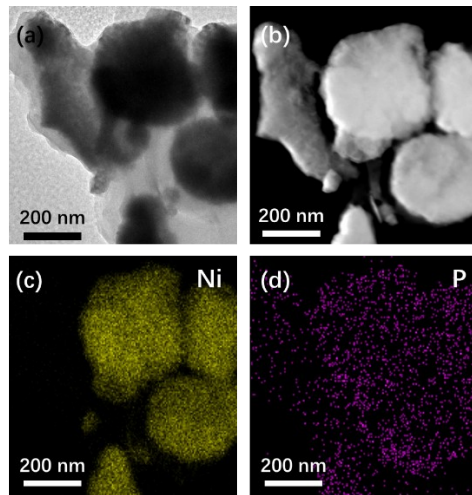

Figure S4. (a) TEM images, (b) HAADF-TEM images of CPNi/AP, and (c)-(d) corresponding Ni and P EDS images.

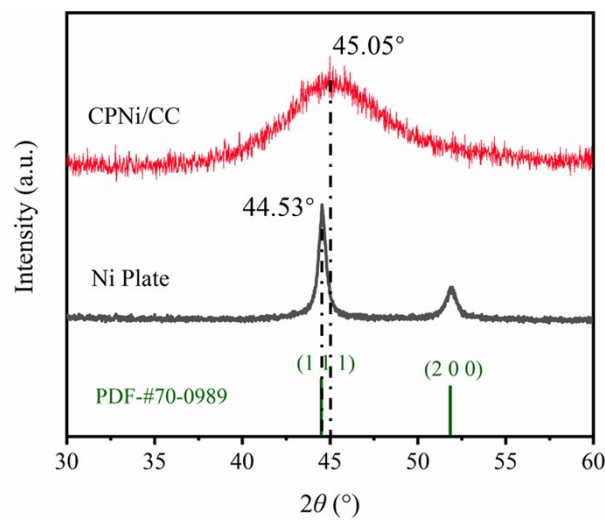

Figure S5. XRD patterns of Ni Plate, cracked phosphorus doped nickel plating on carbon cloth (CPNi/CC) at 30° to 60° magnification intervals.

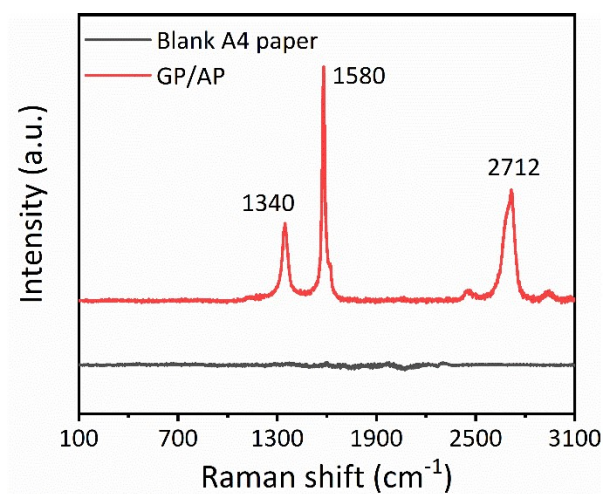

Figure S6. Raman spectra of the blank A4 paper and GP/AP.

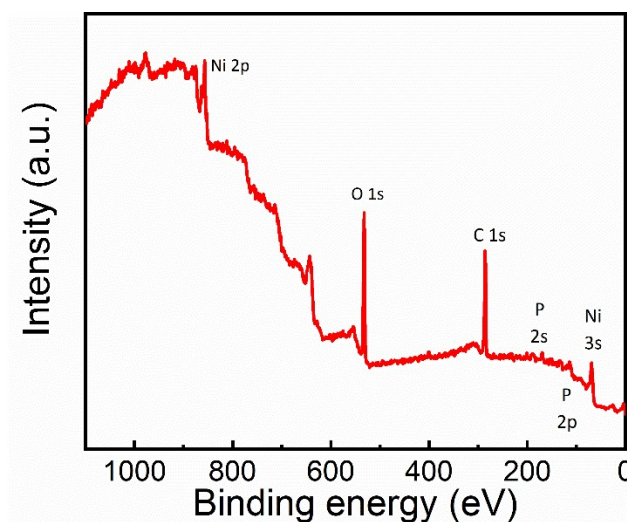

Figure S7. XPS survey spectrum of CPNi/AP.

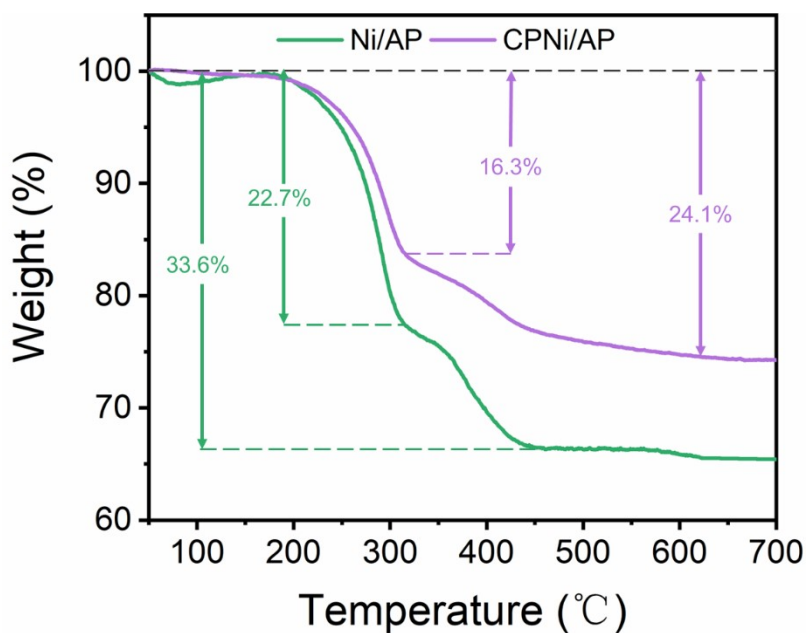

Figure S8. TG curves of CPNi/AP and Ni/AP.

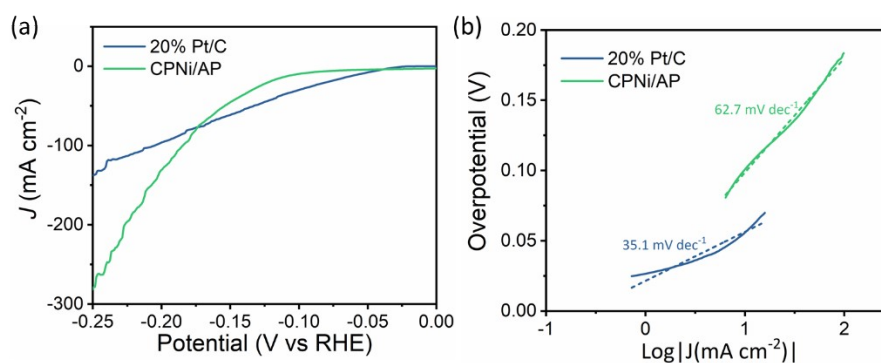

Figure S9. (a) HER polarization curves and (b) Tafel plots of 20% Pt/C and CPNi/AP in 1.0M KOH solution at a scan rate of  $1 \text{ mV s}^{-1}$ .

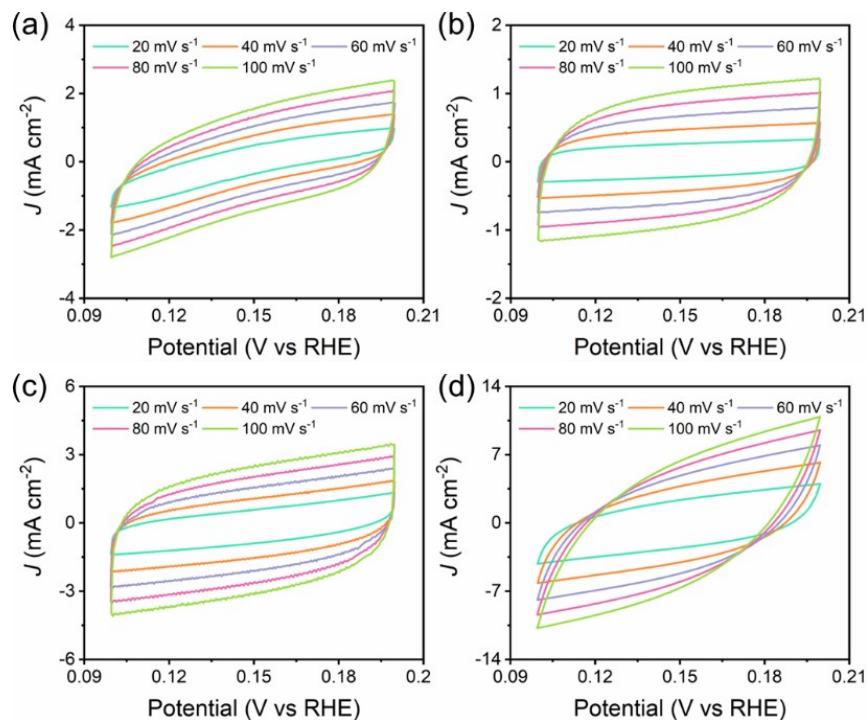

Figure S10. CV curves of (a) Pt plate, (b) Ni plate, (c) Ni/AP and (d) CPNi/AP with different current density.

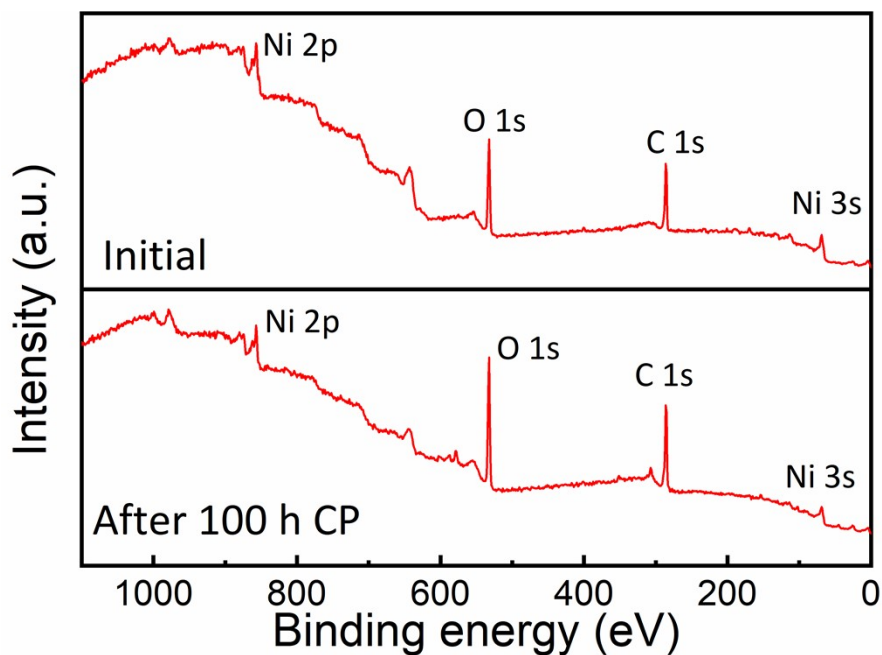

Figure S11. XPS survey spectra of CPNi/AP before and after the chronopotentiometry tests with a constant current density of 10 mA cm<sup>-2</sup> for 100 h.

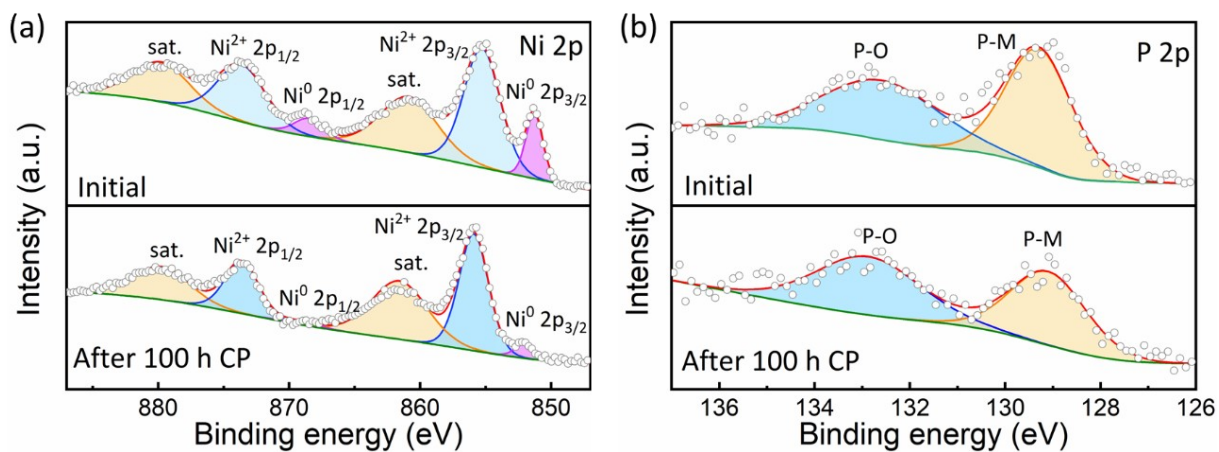

Figure S12. High-resolution XPS spectra of (a) Ni 2p and (b) P 2p in CPNi/AP before and after the chronopotentiometry tests with a constant current density of  $10 \text{ mA cm}^{-2}$  for 100 h.

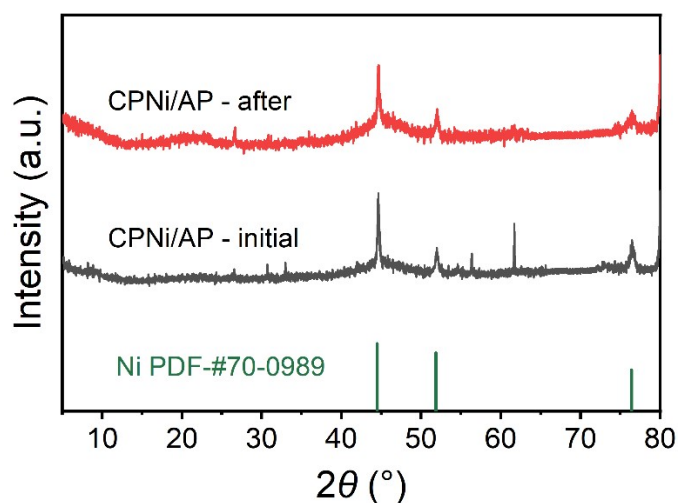

Figure S13. XRD patterns of CPNi/AP before and after reaction.

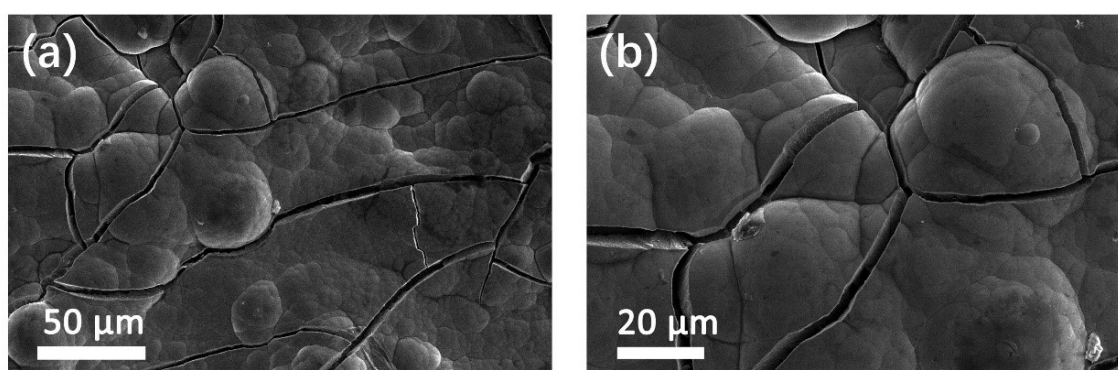

Figure S14. SEM images of CPNi/AP at different magnifications after 100 h CP test.

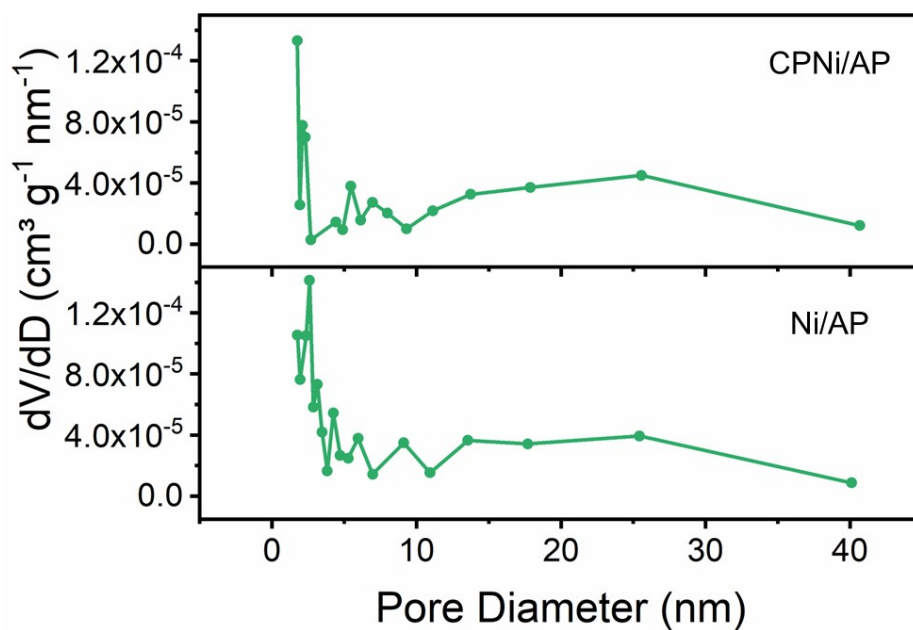

Figure S15. Pore size distribution of CPNi/AP and Ni/AP.

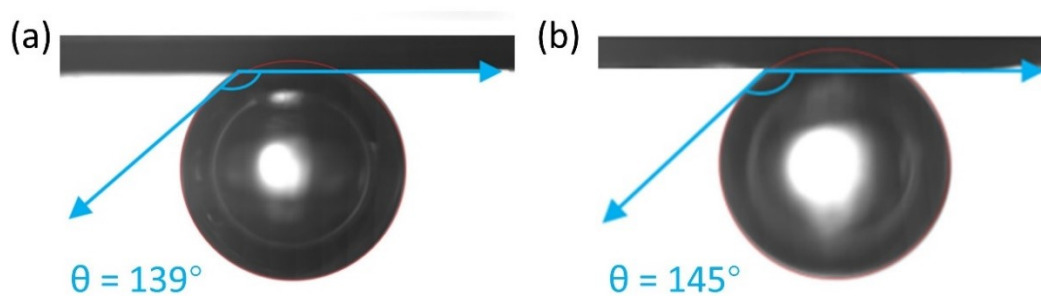

Figure S16. The gas bubble contact angles of (a) Ni plate and (b) Ni/AP.

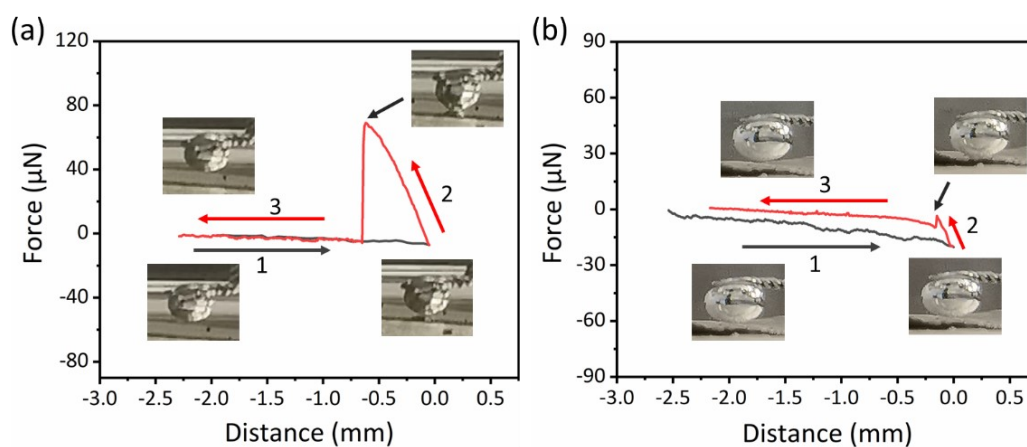

Figure S17. Adhesive forces measurements of the gas bubbles on (a) Ni plate and (b) Ni/AP.

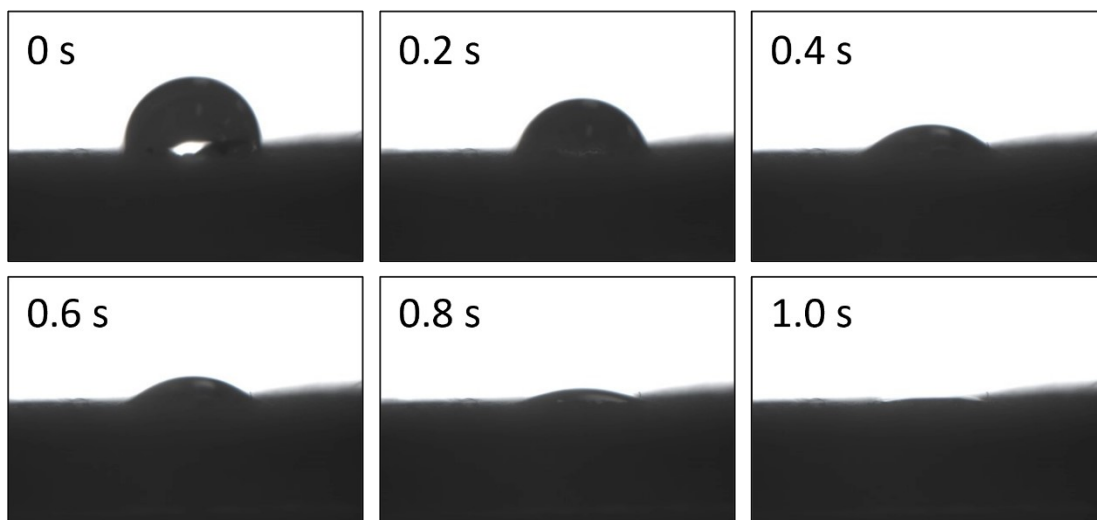

Figure S18. Contact angle of CPNi/AP.



Table S1. Selected summary of the HER performance of some Ni<sub>x</sub>P catalysts.

| Catalyst                                          | Substrate        | Electrolyte                          | Overpotential (mV) |              | Synthetic method      | Ref.         |
|---------------------------------------------------|------------------|--------------------------------------|--------------------|--------------|-----------------------|--------------|
|                                                   |                  |                                      | $\eta_{10}$        | $\eta_{100}$ |                       |              |
| Ni <sub>2</sub> P nanosheets                      | Glassy carbon    | 1 M KOH                              | 168                |              | Hydrothermal          | [1]          |
| Ni <sub>5</sub> P <sub>4</sub> Nanocrystalline    | Glassy carbon    | 1 M KOH                              | 49                 | 202          | Solvothermal          | [2]          |
| Ni <sub>12</sub> P <sub>5</sub> hollow            | Glassy carbon    | 1 M KOH                              | 208                |              | Thermal decomposition | [3]          |
| NiP <sub>x</sub> nanospheres                      | Glassy carbon    | 0.1 M buffer solution                | 230                | 360*         | Electrosynthesis      | [4]          |
| NiP <sub>2</sub> nanosheet arrays                 | Carbon cloth     | 0.5 M H <sub>2</sub> SO <sub>4</sub> | 75                 | 204          | Hydrothermal          | [5]          |
| Ni <sub>5</sub> P <sub>4</sub> nanosheets         | Glassy carbon    | 1 M KOH                              | 147                |              | Ice-templating        | [6]          |
| Ni <sub>2</sub> P                                 | Carbon cloth     | 1 M KOH                              | 114                | 290*         | Hydrothermal          | [7]          |
| Ni <sub>2</sub> P                                 | Ni foam          | 1 M KOH                              | 207                | 400*         | Hydrothermal          | [8]          |
| Fe-Ni <sub>2</sub> P                              | Ni foam          | 1 M KOH                              | 75                 | 226          | Hydrothermal          | [9]          |
| Ni-P                                              | Ni foam          | 1 M KOH                              | 200                | 310          | Hydrothermal          | [10]         |
| Ni <sub>2</sub> P                                 | Porous carbon    | 0.5 M H <sub>2</sub> SO <sub>4</sub> | 194                |              | Thermal decomposition | [11]         |
| Ni-P                                              | Carbon nanotubes | 1 M KOH                              | 126                |              | Powder sintering      | [12]         |
| NiP                                               | Glassy carbon    | 1 M KOH                              | 155                | 400*         | Hydrothermal          | [13]         |
| HP Ni-P                                           | RDE              | 1 M KOH                              | 99                 | 144          | Electrodeposition     | [14]         |
| Ni <sub>2</sub> P/Ni <sub>12</sub> P <sub>5</sub> | Ni foam          | 1 M KOH                              | 95                 | 203          | Hydrothermal          | [15]         |
| CPNi/AP                                           | A4 paper         | 1 M KOH                              | 101                | 183          | Electrodeposition     | Current work |

\* Based on estimation of the LSV curves in the article.

Table S2. The  $R_{ct}$  values for different electrodes in 1 M KOH.

| Electrode | Electrolyte | $R_{ct}(\Omega)$ |
|-----------|-------------|------------------|
| Pt plate  |             | 7.2              |
| Ni plate  | 1 M KOH     | 12.6             |
| Ni/AP     |             | 5.3              |
| CPNi/AP   |             | 2.0              |

Table S3. Table of volume change of  $Ni_{27-x}P_x$ .

| The number of x in $Ni_{27-x}P_x$ | The volume of lattice ( $\text{\AA}^3$ ) |                          |                          |                          |                          | Average volume( $\text{\AA}^3$ ) |
|-----------------------------------|------------------------------------------|--------------------------|--------------------------|--------------------------|--------------------------|----------------------------------|
|                                   | Atomic structure model 1                 | Atomic structure model 2 | Atomic structure model 3 | Atomic structure model 4 | Atomic structure model 5 |                                  |
| 0                                 | 291.33                                   |                          |                          |                          |                          | 291.33                           |
| 1                                 | 290.80                                   | 290.42                   | 290.77                   | 290.42                   |                          | 290.60                           |
| 2                                 | 289.54                                   | 289.54                   | 289.54                   | 289.54                   | 287.89                   | 289.21                           |
| 3                                 | 288.33                                   | 288.63                   |                          |                          |                          | 288.48                           |

## References

- [1] Q. Wang, Z. Liu, H. Zhao, H. Huang, H. Jiao and Y. Du, MOF-derived porous Ni<sub>2</sub>P nanosheets as novel bifunctional electrocatalysts for the hydrogen and oxygen evolution reactions. *J. Mater. Chem. A*, 2018, **6**, 18720-18727.
- [2] A. Laursen, K. Patraju, M. Whitaker, M. Retuerto, T. Sarkar, N. Yao, K. V. Ramanujachary, M. Greenblatt and G. C. Dismukes, Nanocrystalline Ni<sub>5</sub>P<sub>4</sub>: a hydrogen evolution electrocatalyst of exceptional efficiency in both alkaline and acidic media. *Energ. Environ. Sci.*, 2015, **8**, 1027-1034.
- [3] Y. Pan, Y. Liu, J. Zhao, K. Yang, J. Liang, D. Liu, W. Hu, D. Liu, Y. Liu and C. Liu, Monodispersed nickel phosphide nanocrystals with different phases: synthesis, characterization and electrocatalytic properties for hydrogen evolution. *J. Mater. Chem. A*, 2015, **3**, 1656-1665.
- [4] M. Chen, J. Qi, W. Zhang and R. Cao, Electrosynthesis of NiP<sub>x</sub> nanospheres for electrocatalytic hydrogen evolution from a neutral aqueous solution. *Chem. Commun*, 2017, **53**, 5507-5510.
- [5] P. Jiang, Q. Liu and X. Sun, NiP<sub>2</sub> nanosheet arrays supported on carbon cloth: an efficient 3D hydrogen evolution cathode in both acidic and alkaline solutions, *Nanoscale*, 2014, **6**, 13440-13445.
- [6] S. Lai, C. Lv, S. Chen, P. Lu, X. She, L. Wan, H. Wang, J. Sun, D. Yang, X. Zhao, Ultrathin nickel phosphide nanosheet aerogel electrocatalysts derived from Ni-alginate for hydrogen evolution reaction. *J. Alloy. and Compd*, 2020, **817**, 152727.
- [7] Y. Sun, W. Cao, X. Ge, X. Yang, Y. Wang, Y. Xu, B. Ouyang, Q. Shen and C. Li, Built-in electric field induced interfacial charge distributions of Ni<sub>2</sub>P/NiSe<sub>2</sub>

heterojunction for urea-assisted hydrogen evolution reaction, *Inorg. Chem. Front.*, 2023, **10**, 6674-6682.

[8] M. Ma, W. Xia, W. Liu, X. Guo, D. Cao and D. Cheng, Constructing NiMoP nanorod arrays with a highly active Ni<sub>2</sub>P/NiMoP<sub>2</sub> interface for hydrogen evolution in 0.5 M H<sub>2</sub>SO<sub>4</sub> and 1.0 M KOH media, *Mater. Chem. Front.*, 2023, **7**, 4029-4039.

[9] J. Zhang, J. Wang, H. Zhang, Y. Hu and H. Jiang, Chunzhong Li, Hierarchically Heterostructured Ni(OH)<sub>2</sub>/Fe–Ni<sub>2</sub>P Nanoarray: A Synergistic Electrocatalyst for Accelerating Alkaline Hydrogen Evolution, *ACS Sustainable Chem. Eng.* 2023, **11**, 458–463.

[10] Q. Xu, P. Wang, L. Wan, Z. Xu, M. Z. Sultana and B. Wang, Superhydrophilic/Superaerophobic Hierarchical NiP<sub>2</sub>@MoO<sub>2</sub>/Co(Ni)MoO<sub>4</sub> Core–Shell Array Electrocatalysts for Efficient Hydrogen Production at Large Current Densities, *ACS Appl. Mater. Interfaces* 2022, **14**, 19448–19458.

[11] Y. Lin, J. Zhang, Y. Pan and Y. Liu, Nickel phosphide nanoparticles decorated nitrogen and phosphorus co-doped porous carbon as efficient hybrid catalyst for hydrogen evolution, *Appl. Surf. Sci.*, 2017, **422**, 828–837.

[12] D. Li, W. Lan, Z. Liu and Y. Xu, Powder sintered Ni-P/CNTs composites as three-dimensional self-supported efficient electrocatalysts for hydrogen evolution reaction, *J. Alloys Compd.*, 2020, **825**, 153920.

[13] Y. Hou, Z. Yuan, X. Yu, B. Ma, L. Zhao and D. Kong, Directly preparing well-dispersed ultra-hydrophilic NiFeP nanoparticle/Mxene complexes from spent electroless Ni plating solution as efficient hydrogen evolution catalysts, *J. Environ.*

Chem. Eng., 2023, **11**, 109738.

[14] D. Song, D. Hong, Y. Kwon, H. Kim, J. Shin, H. Lee and E. Cho, Highly porous Ni-P electrode synthesized by an ultrafast electrodeposition process for efficient overall water electrolysis, *J. Mater. Chem. A*, 2020, **8**, 12069-12079.

[15] T. Zhao, S. Wang, Y. Li, C. Jia, Z. Su, D. Hao, B. Ni, Q. Zhang and C. Zhao, Heterostructured V-Doped Ni<sub>2</sub>P/Ni<sub>12</sub>P<sub>5</sub> Electrocatalysts for Hydrogen Evolution in Anion Exchange Membrane Water Electrolyzers, *Small*, 2022, **18**, 2204758.
